# Supplementary material for: Cellular stress due to impairment of collagen prolyl hydroxylation complex is rescued by the chaperone 4-phenylbutyrate
Source: PubMed Central journal article supplement (PMC6602311; doi:10.1242/dmm.038521), 2019-06-20
Supplement: dmm-12-038521-s1.pdf [file dmm-12-038521-s1.pdf]

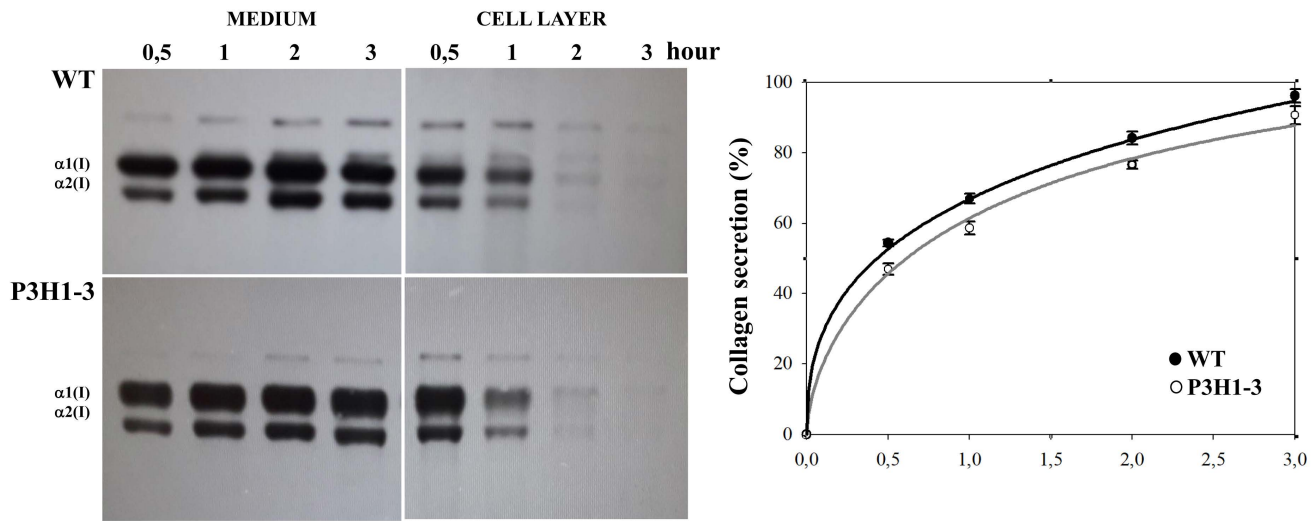

**Fig. S1. Collagen secretion in mutant cells.** Type I collagen secretion was evaluated by incubating the cells with  $^3\text{H}$ -Pro and extracting the collagen from both medium and cell layer fractions at the indicated time points. Samples were run on SDS-PAGE and the ratio between the densitometric value of collagen  $\alpha 1(\text{I})$  in the media and the total collagen  $\alpha 1(\text{I})$  (collagen present in medium and in cell layer) was evaluated and shown in the plot. Collagen secretion is delayed in the mutant cells tested compared to controls.

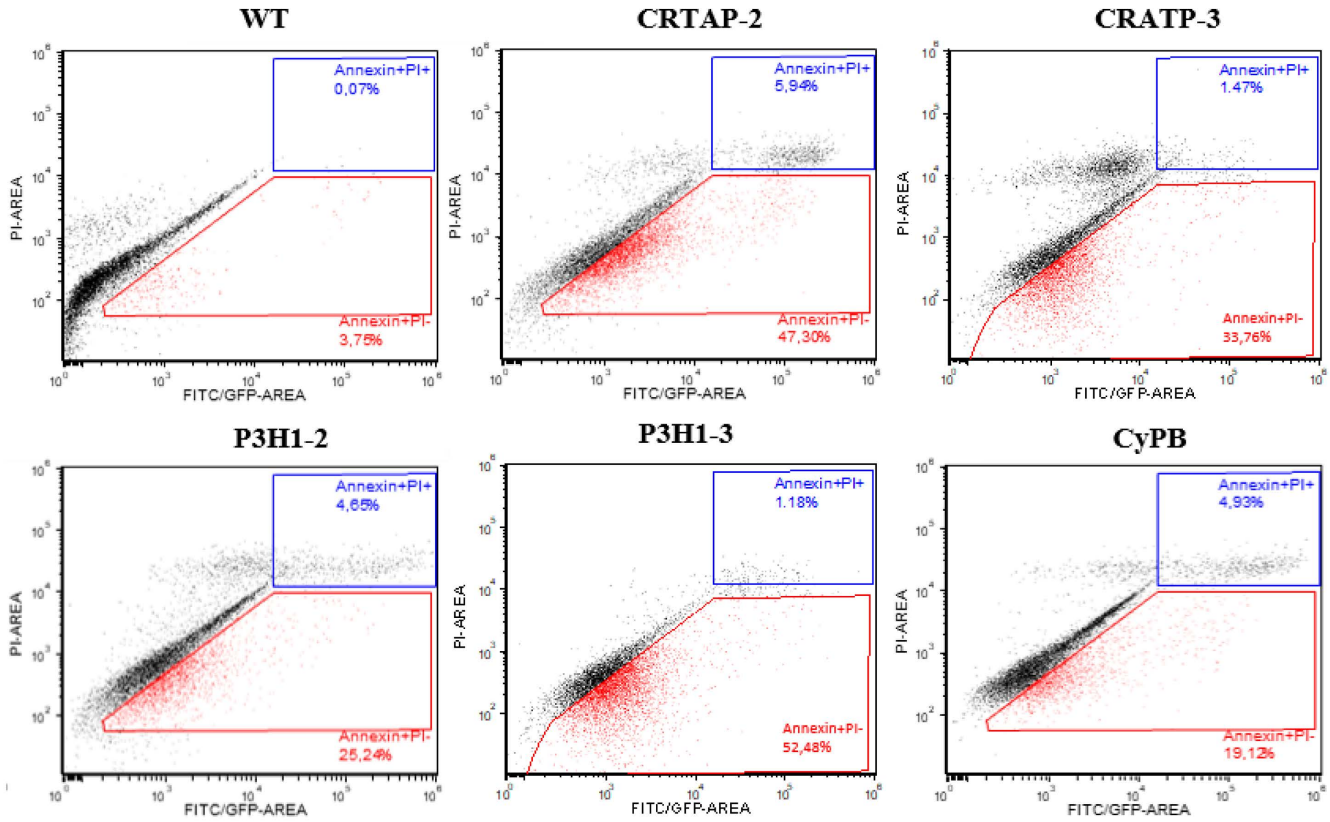

**Fig. S2. FACS analysis of mutant cells.** Representative plots of the fraction of apoptotic events in WT and OI patients' fibroblasts upon cells staining with annexin V (FITC) and propidium iodide (PI).

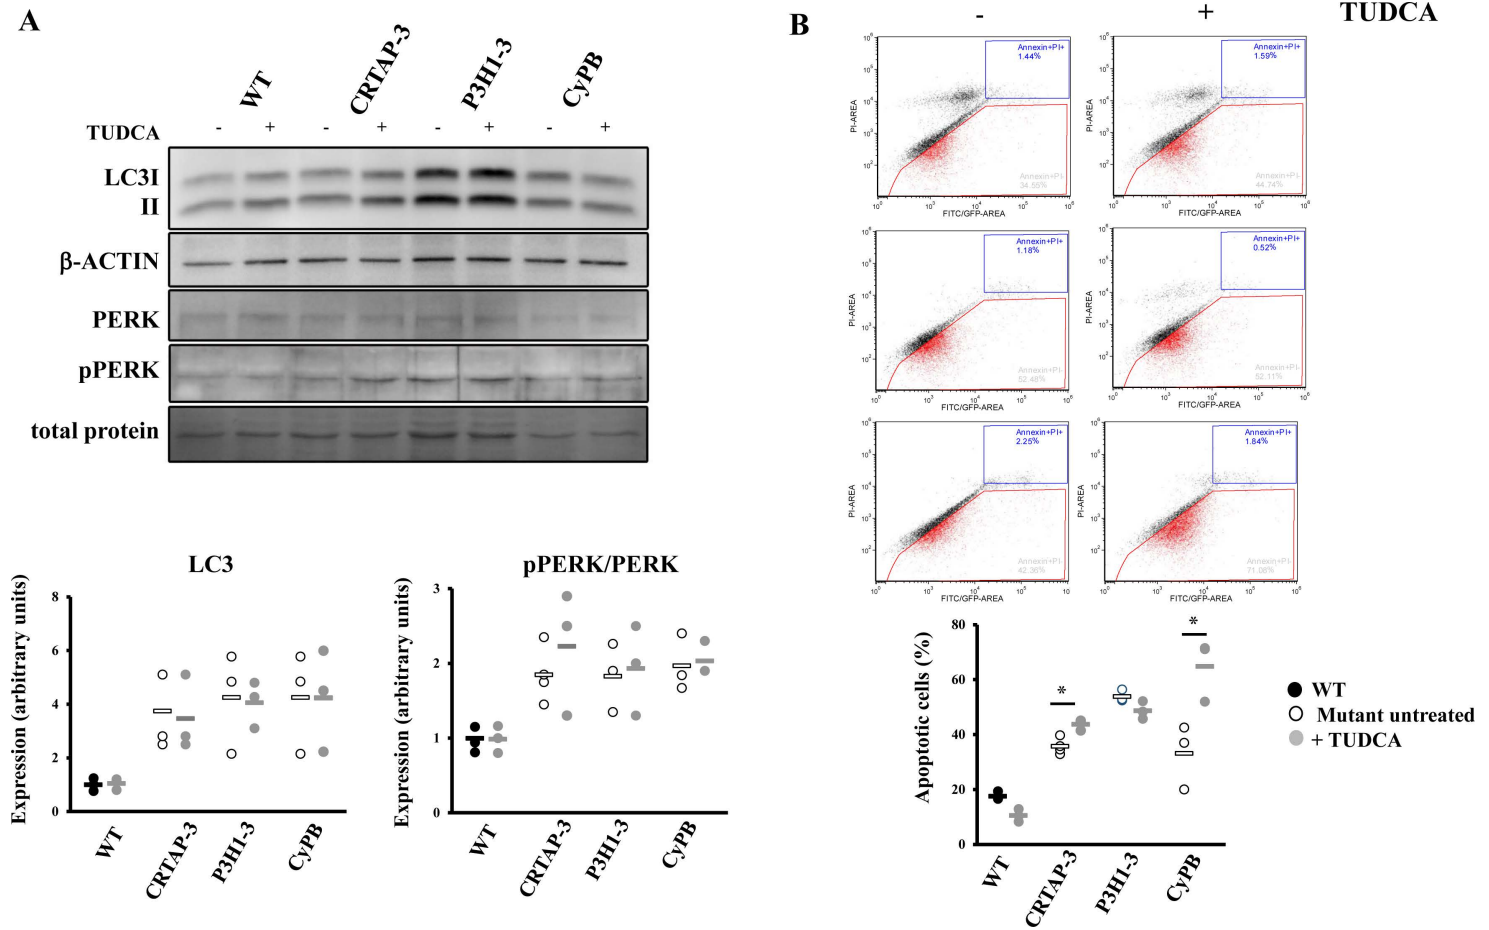

**Fig. S3. TUDCA does not ameliorate recessive OI fibroblasts homeostasis.** (A) Representative western blots (top) and quantitative analysis (bottom) of p-PERK and LC3II in absence (-) or in presence (+) of TUDCA in control (WT) cells and in cells with mutations in CRTAP, P3H1 and CypB. The levels of these proteins were compared in treated versus untreated cells. p-PERK/PERK and LC3II levels were unchanged.  $\beta$ -actin is used for normalization. (B) Quantitative analysis of the fraction of apoptotic events in the cell lines following FACS analysis upon cells staining with annexin V (FITC) and propidium iodide (PI). TUDCA did not reduce the percentage of apoptotic cells in mutant lines. \*  $p < 0.05$ .

**Table S1**

| <b>Antibody</b> | <b>Company</b>     | <b>Catalog Number</b> | <b>% Acrylamide running gel</b> |
|-----------------|--------------------|-----------------------|---------------------------------|
| BiP             | Cell signaling     | 31777                 | 10                              |
| PDI             | Cell signaling     | 3501                  | 10                              |
| PERK            | Cell signaling     | 5683                  | 6                               |
| P PERK          | Cell signaling     | 3179S                 | 6                               |
| ATF6            | Abcam              | ab122897              | 10                              |
| ATF4            | Novus biological   | NB100-8525            | 10                              |
| LC3             | Cell signaling kit | 12741                 | 15                              |
| Cleaved CASP3   | Cell signaling kit | 9915                  | 15                              |
| CyPB            | Proteintech        | 11607-1-AP            | 15                              |
| P3H1            | Abnova             | H00064175-b01p        | 10                              |
| CRTAP           | Brendan Lee lab    | Brendan Lee lab       | 10                              |
